# Supplementary material for: Serum Nardilysin as a Prognostic Biomarker in Pancreatic Ductal Adenocarcinoma
Source: MDPI journal article supplement (doi:10.3390/jcm11113101), 2022-05-30
Supplement: s1 [file s1]

## Supplementary Figure S1

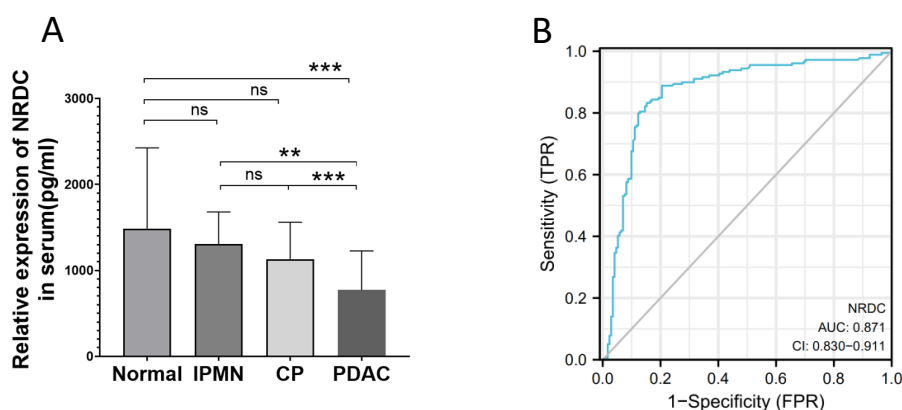

**Figure S1.** The expression levels of NRDC in different groups, including : **(A)** intraductal papillary mucinous neoplasm(IPMN) : n=6, chronic pancreatitis(CP) : n=23, pancreatic neuroendocrine tumor(PN) : n=2, Normal Control(NC):61, pancreatic ductal adenocarcinoma(PDAC) : n=112 . **(B)** Receiver operating characteristic curve (ROC) analyses of serum NRDC in TCGA and GTEx database. ns: none significance, \*\*  $p < 0.01$ , \*\*\*  $p < 0.001$ .

### Supplementary Table S1

**Table S1.** Expression of NRDC in PDAC and its precursor lesions.

| Diagnosis                                        | <i>n</i> | Expression score<br>mean ± SD | <i>P</i> value                  |
|--------------------------------------------------|----------|-------------------------------|---------------------------------|
| intraductal papillary<br>mucinous neoplasm(IPMN) | 6        | 1308 ± 340                    | <i>p</i> =0.0054<br>(vs PDAC)   |
| chronic pancreatitis(CP)                         | 23       | 1132 ± 418                    | <i>p</i> =0.0006<br>(vs PDAC)   |
| pancreatic neuroendocrine<br>tumor(PNT)          | 2        | 747 ± 66                      | <i>p</i> =0.93965<br>(vs PDAC)  |
| Normal Control(NC)                               | 61       | 1483 ± 933                    | <i>p</i> <0.0001<br>(vs PDAC)   |
| pancreatic ductal<br>adenocarcinoma(PDAC)        | 112      | 771 ± 453                     | <i>p</i> <0.0001<br>(vs others) |

SD, standard deviation; vs, versus
